# Supplementary material for: Automated measurements of greenhouse gases fluxes from tree stems and soils: magnitudes, patterns and drivers
Source: PubMed Central journal article supplement (PMC6408546; doi:10.1038/s41598-019-39663-8), 2019-03-08
Supplement: 41598_2019_39663_MOESM1_ESM.pdf [file 41598_2019_39663_MOESM1_ESM.pdf]

**Automated measurements of greenhouse gases fluxes from tree stems and soils: magnitudes, patterns and drivers**

*Supplementary Information*

Authors:

Josep Barba<sup>1</sup>, Rafael Poyatos<sup>2,3</sup> and Rodrigo Vargas<sup>1\*</sup>

<sup>1</sup> Department of Plant and Soil Science. University of Delaware. Newark, Delaware, 19717 USA

<sup>2</sup> CREAM. Cerdanyola del Vallès 08193 (Barcelona), Catalonia, Spain

<sup>3</sup> Laboratory of Plant Ecology. Faculty of Bioscience Engineering. Ghent University. Ghent, 9000  
Belgium

\* Corresponding author:

Rodrigo Vargas

Email: [rvargas@udel.edu](mailto:rvargas@udel.edu)

Phone: 302-831-1386, Fax: 302-831-0605

SFigure 1. Seasonal course of CO<sub>2</sub>, CH<sub>4</sub> and N<sub>2</sub>O fluxes (panels a, b and c, respectively) associated to UpperStem (black), LowerStem (blue) and Soil (red) chambers. Points are hourly means taken from Day of the Year 102 to 202 (April 12<sup>th</sup> 2017 - July 21<sup>st</sup> 2017) and lines depict smoothed temporal patterns for CO<sub>2</sub>, CH<sub>4</sub> and N<sub>2</sub>O fluxes.

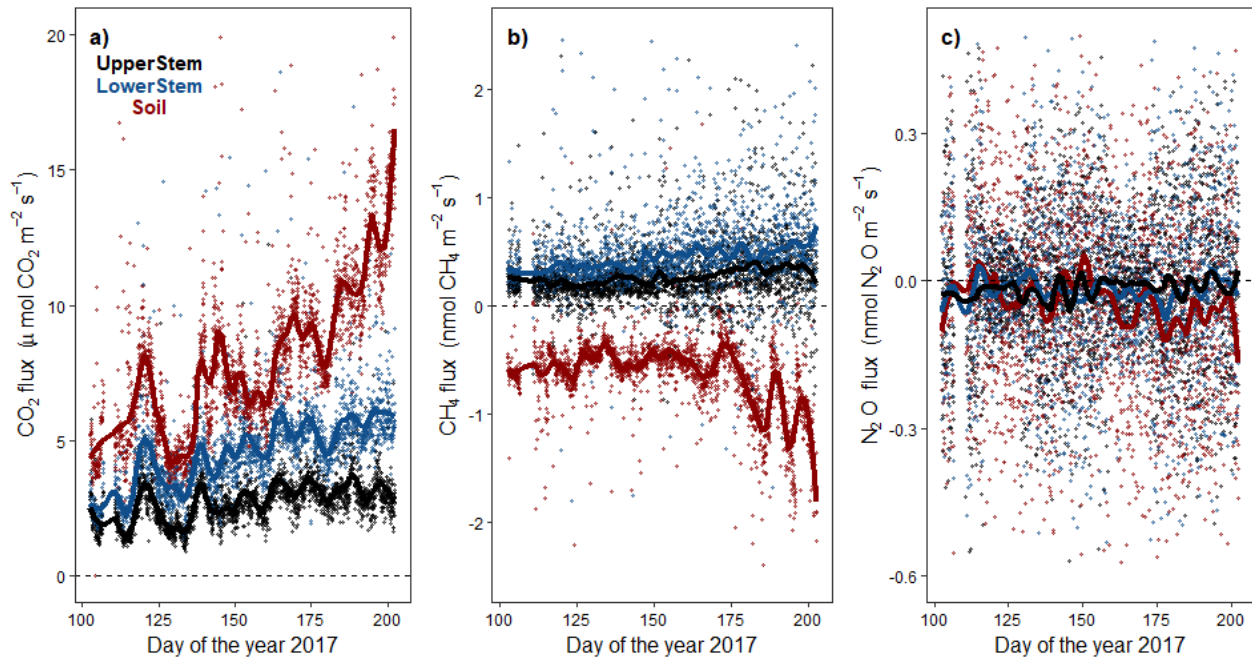

STable 1. Summary of the models differing less than 2 AICc units from the selected model for each greenhouse gas (CO<sub>2</sub>, CH<sub>4</sub> and N<sub>2</sub>O) and each position (UpperStem, LowerStem and Soil). All variables were scaled to improve the performance and interpretability of the models.

| MODEL                          | Variables   | Estimate | SE    | t-value | p-value |
|--------------------------------|-------------|----------|-------|---------|---------|
| Soil CO <sub>2</sub>           | (Intercept) | 0.162    | 0.254 | 0.639   | 0.525   |
| <b>selected model</b>          | Temperature | 1.011    | 0.116 | 8.684   | <0.001  |
| <i>adjR<sup>2</sup> = 0.99</i> | SWC         | 0.174    | 0.095 | 1.825   | 0.072   |
| <i>AICc = 47.89</i>            | SF          | 0.081    | 0.036 | 2.255   | 0.027   |
|                                | Temp*SWC    | -0.240   | 0.072 | -3.315  | 0.001   |
| Soil CO <sub>2</sub>           | (Intercept) | 0.282    | 0.380 | 0.742   | 0.460   |
| Model 2                        | Temperature | 1.011    | 0.122 | 8.317   | < 0.001 |
| <i>adjR<sup>2</sup> = 0.99</i> | SWC         | 0.249    | 0.100 | 2.494   | 0.015   |
| <i>AICc = 51.82</i>            | SF          | 0.091    | 0.036 | 2.568   | 0.012   |
|                                | Temp*SWC    | -0.250   | 0.073 | -3.441  | < 0.001 |
|                                | Temp*SF     | -0.062   | 0.034 | -1.800  | 0.076   |
| Soil CO <sub>2</sub>           | (Intercept) | 0.190    | 0.157 | 1.207   | 0.231   |
| Model 3                        | Temperature | 0.928    | 0.103 | 9.052   | < 0.001 |
| <i>adjR<sup>2</sup> = 0.98</i> | SWC         | 0.071    | 0.073 | 0.975   | 0.333   |
| <i>AICc = 45.43</i>            | Temp*SWC    | -0.160   | 0.055 | -2.890  | 0.005   |
| LowerStem CO <sub>2</sub>      | (Intercept) | 0.106    | 0.142 | 0.747   | 0.457   |
| <b>selected model</b>          | Temperature | 0.517    | 0.095 | 5.446   | <0.001  |
| <i>adjR<sup>2</sup> = 0.92</i> | SWC         | 0.192    | 0.104 | 1.841   | 0.069   |
| <i>AICc = 98..44</i>           | SF          | 0.159    | 0.049 | 3.266   | 0.002   |
|                                | Temp*SWC    | 0.206    | 0.079 | 2.606   | 0.011   |
|                                | Temp*SF     | -0.254   | 0.044 | -5.723  | <0.001  |
| LowerStem CO <sub>2</sub>      | (Intercept) | 0.139    | 0.123 | 1.139   | 0.258   |
| Model 2                        | Temperature | 0.501    | 0.089 | 5.609   | < 0.001 |
| <i>adjR<sup>2</sup> = 0.92</i> | SWC         | 0.211    | 0.108 | 1.949   | 0.055   |
| <i>AICc = 103.53</i>           | SF          | 0.189    | 0.059 | 3.194   | 0.002   |
|                                | Temp*SWC    | 0.226    | 0.086 | 2.642   | 0.010   |
|                                | Temp*SF     | -0.255   | 0.045 | -5.611  | < 0.001 |
|                                | SWC*SF      | -0.055   | 0.072 | -0.757  | 0.451   |
| UpperStem CO <sub>2</sub>      | (Intercept) | -0.113   | 0.125 | -0.909  | 0.366   |
| <b>selected model</b>          | Temperature | 0.634    | 0.084 | 7.578   | < 0.001 |
| <i>adjR<sup>2</sup> = 0.93</i> | SWC         | 0.566    | 0.106 | 5.351   | < 0.001 |

|                                |             |        |       |        |         |
|--------------------------------|-------------|--------|-------|--------|---------|
| <i>AICc = 93.90</i>            | SF          | -0.001 | 0.058 | -0.002 | 0.998   |
|                                | Temp*SF     | -0.200 | 0.045 | -4.456 | < 0.001 |
|                                | SWC*SF      | 0.318  | 0.067 | 4.772  | < 0.001 |
| <hr/>                          |             |        |       |        |         |
| Soil CH <sub>4</sub>           | (Intercept) | -0.142 | 0.090 | -1.580 | 0.118   |
| <b>selected model</b>          | Temperature | -0.666 | 0.085 | -7.822 | <0.001  |
| <i>adjR<sup>2</sup> = 0.90</i> | SWC         | 0.761  | 0.076 | 9.966  | <0.001  |
| <i>AICc = 108.33</i>           | Temp*SWC    | 0.427  | 0.065 | 6.540  | <0.001  |
| <hr/>                          |             |        |       |        |         |
| LowerStem CH <sub>4</sub>      | (Intercept) | 0.002  | 0.096 | 0.021  | 0.983   |
| <b>selected model</b>          | Temperature | 0.447  | 0.097 | 4.613  | <0.001  |
| <i>adjR<sup>2</sup> = 0.34</i> | SWC         | 0.279  | 0.096 | 2.903  | 0.005   |
| <i>AICc = 236.34</i>           |             |        |       |        |         |
| <hr/>                          |             |        |       |        |         |
| LowerStem CH <sub>4</sub>      | (Intercept) | 0.000  | 0.092 | -0.002 | 0.999   |
| Model 2                        | Temperature | 0.328  | 0.103 | 3.177  | 0.002   |
| <i>adjR<sup>2</sup> = 0.31</i> | SF          | 0.298  | 0.103 | 2.907  | 0.005   |
| <i>AICc = 239.96</i>           |             |        |       |        |         |
| <hr/>                          |             |        |       |        |         |
| LowerStem CH <sub>4</sub>      | (Intercept) | 0.000  | 0.091 | 0.002  | 0.998   |
| Model 3                        | Temperature | 0.364  | 0.103 | 3.536  | 0.001   |
| <i>adjR<sup>2</sup> = 0.35</i> | SWC         | 0.252  | 0.114 | 2.217  | 0.029   |
| <i>AICc = 239.65</i>           | SF          | 0.132  | 0.124 | 1.064  | 0.290   |
| <hr/>                          |             |        |       |        |         |
| UpperStem CH <sub>4</sub>      | (Intercept) | 0.001  | 0.088 | 0.010  | 0.992   |
| <b>selected model</b>          | Temperature | 0.451  | 0.098 | 4.488  | < 0.001 |
| <i>adjR<sup>2</sup> = 0.39</i> | SF          | 0.254  | 0.097 | 2.620  | 0.01    |
| <i>AICc = 227.99</i>           |             |        |       |        |         |
| <hr/>                          |             |        |       |        |         |
| UpperStem CH <sub>4</sub>      | (Intercept) | -0.091 | 0.092 | -0.991 | 0.325   |
| Model 2                        | Temperature | 0.465  | 0.098 | 4.731  | < 0.001 |
| <i>adjR<sup>2</sup> = 0.40</i> | SF          | 0.289  | 0.095 | 3.028  | 0.003   |
| <i>AICc = 230.70</i>           | Temp*SF     | 0.144  | 0.098 | 1.470  | 0.145   |
| <hr/>                          |             |        |       |        |         |
| UpperStem CH <sub>4</sub>      | (Intercept) | -0.081 | 0.097 | -0.844 | 0.401   |
| Model 3                        | Temperature | 0.459  | 0.100 | 4.488  | < 0.001 |
| <i>adjR<sup>2</sup> = 0.40</i> | SWC         | -0.045 | 0.128 | -0.351 | 0.726   |
| <i>AICc = 234.85</i>           | SF          | 0.313  | 0.119 | 2.638  | 0.010   |
|                                | Temp*SF     | 0.140  | 0.099 | 1.415  | 0.161   |
| <hr/>                          |             |        |       |        |         |
| UpperStem CH <sub>4</sub>      | (Intercept) | -0.019 | 0.088 | -0.211 | 0.833   |
| Model 4                        | Temperature | 0.440  | 0.101 | 4.339  | < 0.001 |
| <i>adjR<sup>2</sup> = 0.39</i> | SWC         | -0.060 | 0.129 | -0.464 | 0.644   |

|                            |             |                                 |    |        |       |        |       |
|----------------------------|-------------|---------------------------------|----|--------|-------|--------|-------|
|                            |             |                                 |    |        |       |        |       |
|                            |             | <i>AICc</i> = 232.03            | SF | 0.307  | 0.120 | 2.559  | 0.012 |
| <hr/>                      |             |                                 |    |        |       |        |       |
| Soil N <sub>2</sub> O      | (Intercept) |                                 |    | -0.006 | 0.131 | -0.045 | 0.964 |
| <b>selected model</b>      | Temperature |                                 |    | -0.382 | 0.129 | -2.960 | 0.004 |
|                            |             | <i>adjR</i> <sup>2</sup> = 0.22 |    |        |       |        |       |
|                            |             | <i>AICc</i> = 243.92            |    |        |       |        |       |
| <hr/>                      |             |                                 |    |        |       |        |       |
| Soil N <sub>2</sub> O      | (Intercept) |                                 |    | -0.001 | 0.132 | -0.009 | 0.993 |
| Model 2                    | Temperature |                                 |    | -0.432 | 0.138 | -3.119 | 0.003 |
|                            | SWC         |                                 |    | 0.138  | 0.131 | 1.047  | 0.298 |
|                            |             | <i>adjR</i> <sup>2</sup> = 0.23 |    |        |       |        |       |
|                            |             | <i>AICc</i> = 247.04            |    |        |       |        |       |
| <hr/>                      |             |                                 |    |        |       |        |       |
| Soil N <sub>2</sub> O      | (Intercept) |                                 |    | -0.004 | 0.128 | -0.033 | 0.974 |
| Model 3                    | Temperature |                                 |    | -0.435 | 0.148 | -2.946 | 0.004 |
|                            | SF          |                                 |    | 0.089  | 0.128 | 0.697  | 0.488 |
|                            |             | <i>adjR</i> <sup>2</sup> = 0.22 |    |        |       |        |       |
|                            |             | <i>AICc</i> = 247.74            |    |        |       |        |       |
| <hr/>                      |             |                                 |    |        |       |        |       |
| LowerStem N <sub>2</sub> O |             |                                 |    |        |       |        |       |
| <b>selected model</b>      |             |                                 |    |        |       |        |       |
|                            |             | <i>p-value</i> = n.s.           |    |        |       |        |       |
|                            |             | <i>AICc</i> = 259.57            |    |        |       |        |       |
| <hr/>                      |             |                                 |    |        |       |        |       |
| LowerStem N <sub>2</sub> O | (Intercept) |                                 |    | -0.003 | 0.117 | -0.025 | 0.980 |
| Model 2                    | SF          |                                 |    | -0.179 | 0.112 | -1.599 | 0.113 |
|                            |             | <i>adjR</i> <sup>2</sup> = 0.04 |    |        |       |        |       |
|                            |             | <i>AICc</i> = 261.61            |    |        |       |        |       |
| <hr/>                      |             |                                 |    |        |       |        |       |
| UpperStem N <sub>2</sub> O | (Intercept) |                                 |    | 0.003  | 0.114 | 0.026  | 0.980 |
| <b>selected model</b>      | Temperature |                                 |    | 0.240  | 0.126 | 1.899  | 0.061 |
|                            | SWC         |                                 |    | 0.260  | 0.136 | 1.923  | 0.058 |
|                            | SF          |                                 |    | -0.404 | 0.143 | -2.816 | 0.006 |
|                            |             | <i>adjR</i> <sup>2</sup> = 0.13 |    |        |       |        |       |
|                            |             | <i>AICc</i> = 261.28            |    |        |       |        |       |
| <hr/>                      |             |                                 |    |        |       |        |       |
| UpperStem N <sub>2</sub> O | (Intercept) |                                 |    | 0.045  | 0.153 | 0.295  | 0.769 |
| Model 2                    | Temperature |                                 |    | 0.166  | 0.141 | 1.181  | 0.241 |
|                            | SWC         |                                 |    | 0.262  | 0.201 | 1.303  | 0.196 |
|                            | SF          |                                 |    | -0.403 | 0.153 | -2.631 | 0.010 |
|                            | SWC*Sf      |                                 |    | -0.194 | 0.138 | -1.413 | 0.161 |
|                            |             | <i>adjR</i> <sup>2</sup> = 0.14 |    |        |       |        |       |
|                            |             | <i>AICc</i> = 263.67            |    |        |       |        |       |
| <hr/>                      |             |                                 |    |        |       |        |       |
| UpperStem N <sub>2</sub> O | (Intercept) |                                 |    | 0.085  | 0.159 | 0.537  | 0.593 |
| Model 3                    | SWC         |                                 |    | 0.218  | 0.205 | 1.062  | 0.291 |
|                            | SF          |                                 |    | -0.335 | 0.142 | -2.364 | 0.020 |
|                            | SWC*Sf      |                                 |    | -0.237 | 0.140 | -1.694 | 0.094 |
|                            |             | <i>adjR</i> <sup>2</sup> = 0.13 |    |        |       |        |       |
|                            |             | <i>AICc</i> = 260.85            |    |        |       |        |       |

|                                 |             |        |       |        |       |
|---------------------------------|-------------|--------|-------|--------|-------|
| UpperStem N <sub>2</sub> O      | (Intercept) | -0.030 | 0.162 | -0.199 | 0.843 |
| Model 4                         | Temperature | 0.196  | 0.141 | 1.394  | 0.167 |
| <i>adjR</i> <sup>2</sup> = 0.16 | SWC         | 0.282  | 0.200 | 1.413  | 0.161 |
| <i>AICc</i> = 266.35            | SF          | -0.398 | 0.152 | -2.615 | 0.011 |
|                                 | Temp*SF     | 0.160  | 0.125 | 1.281  | 0.204 |
|                                 | SWC*SF      | -0.185 | 0.136 | -1.354 | 0.179 |
| UpperStem N <sub>2</sub> O      | (Intercept) | -0.153 | 0.130 | -1.175 | 0.243 |
| Model 5                         | Temperature | 0.232  | 0.134 | 1.740  | 0.085 |
| <i>adjR</i> <sup>2</sup> = 0.15 | SWC         | 0.427  | 0.164 | 2.594  | 0.011 |
| <i>AICc</i> = 263.79            | SF          | -0.457 | 0.144 | -3.163 | 0.002 |
|                                 | Temp*SF     | 0.168  | 0.124 | 1.356  | 0.179 |
| UpperStem N <sub>2</sub> O      | (Intercept) | -0.147 | 0.130 | -1.128 | 0.262 |
| Model 6                         | Temperature | 0.246  | 0.135 | 1.819  | 0.073 |
| <i>adjR</i> <sup>2</sup> = 0.15 | SWC         | 0.419  | 0.165 | 2.535  | 0.013 |
| <i>AICc</i> = 267.02            | SF          | -0.458 | 0.145 | -3.159 | 0.002 |
|                                 | Temp*SWC    | 0.192  | 0.130 | 1.472  | 0.145 |
|                                 | Temp*SF     | -0.108 | 0.180 | -0.599 | 0.551 |
